# Supplementary material
Source: Springer Nature journal article supplement (https://www.springermedizin.de/resource/supplementary/12916_2006_91_MOESM7_ESM.pdf/9599156)
Supplement: MOESM7 [file 9599156]

negative control  
control  
EGCG 400 $\mu$ M  
EGCG 40 $\mu$ M  
EGCG 4 $\mu$ M  
EGCG 0.4 $\mu$ M  
EGCG 0.2 $\mu$ M  
EGCG 0.04 $\mu$ M

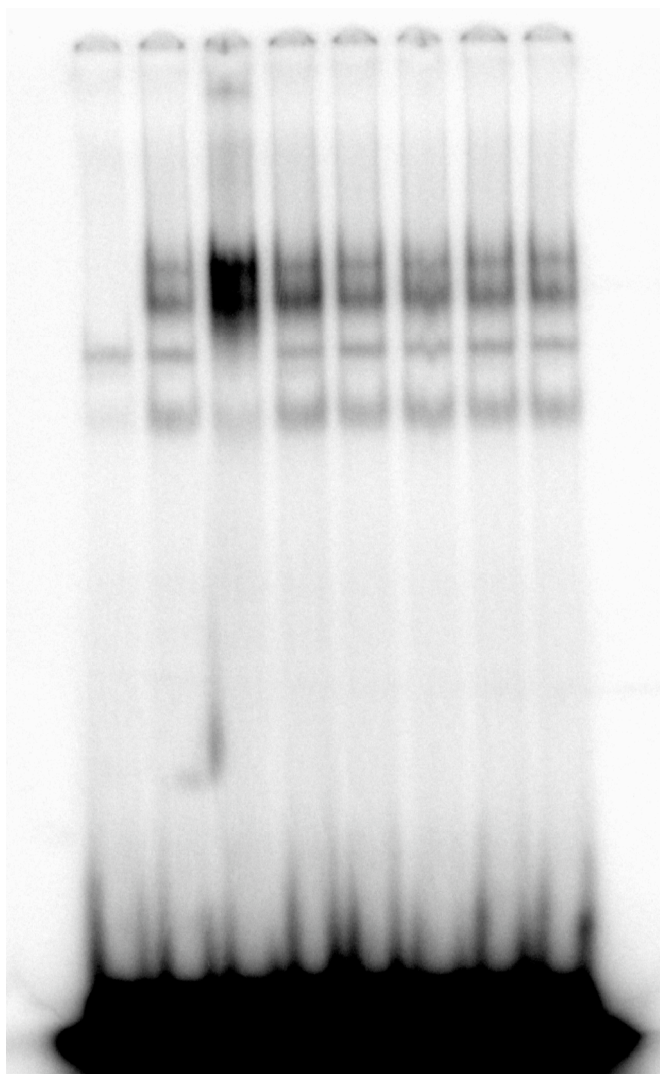

← NF- $\kappa$ B

← n.s.

← free  
oligonucleotide
